# Supplementary material for: Anomalous critical fields in quantum critical superconductors
Source: PubMed Central journal article supplement (PMC4268691; doi:10.1038/ncomms6679), 2014-12-05
Supplement: ncomms6679-s1.pdf [file ncomms6679-s1.pdf]

## SUPPLEMENTARY INFORMATION

Supplementary Figure 1

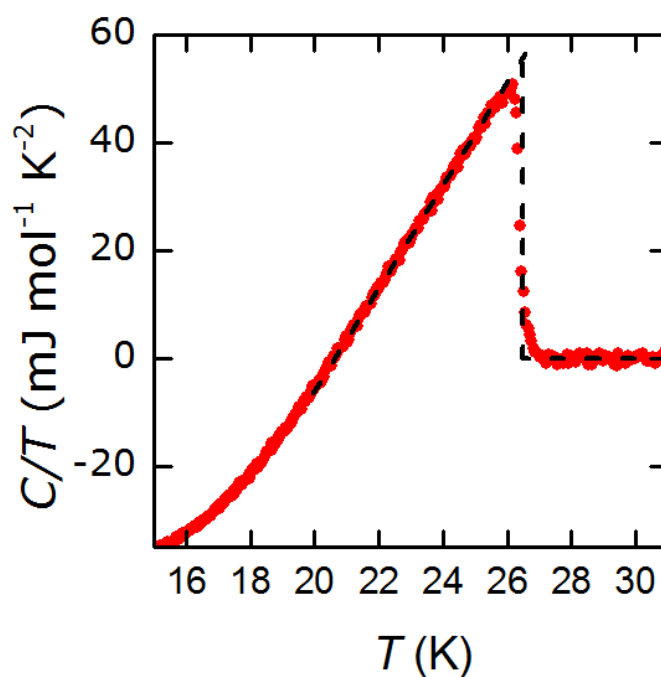

**Supplementary Figure 1** Heat capacity of a sample with  $x = 0.38$  with the normal state heat capacity subtracted. The dashed line is the behaviour expected for a mean-field like jump.

## Supplementary Figure 2

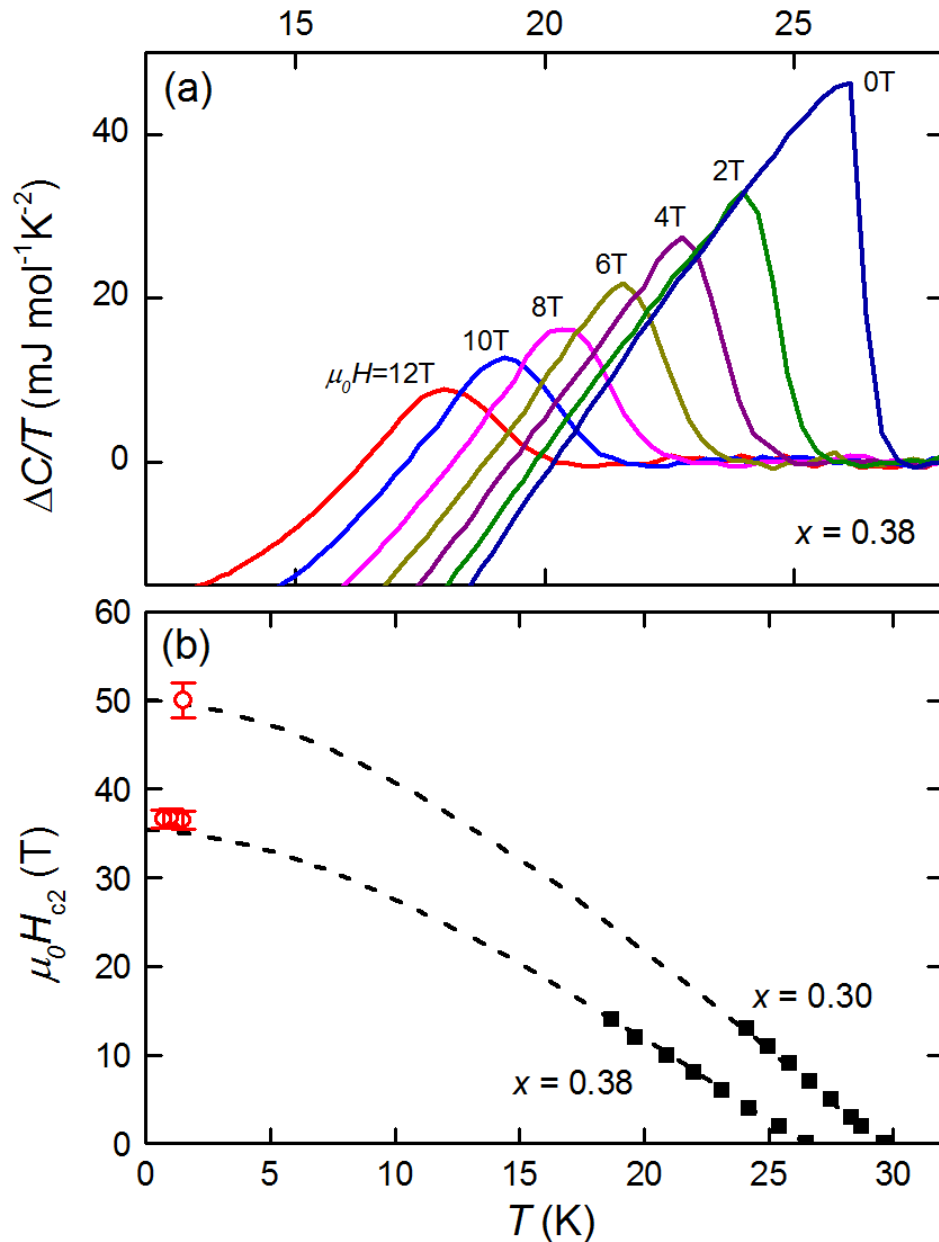

**Supplementary Figure 2** Determination of  $H_{c2}$ . (a) Heat capacity jump of a sample with  $x = 0.38$  at various magnetic fields up to 12 T. A polynomial fit was used to subtract the normal state specific heat. Panel (b) shows  $H_{c2}$  versus temperature for the  $x = 0.38$  sample shown in (a) determined from the midpoint of the jump in the heat capacity and similar data for a sample with  $x = 0.30$ . The open circles are values of  $H_{\text{irr}}$  as determined by torque magnetometry in pulsed field on two other samples with the same values of  $x$  and  $T_c$ . The dashed lines are fits to the clean limit HW model [14] for  $H_{c2}(T)$ .

### Supplementary Figure 3

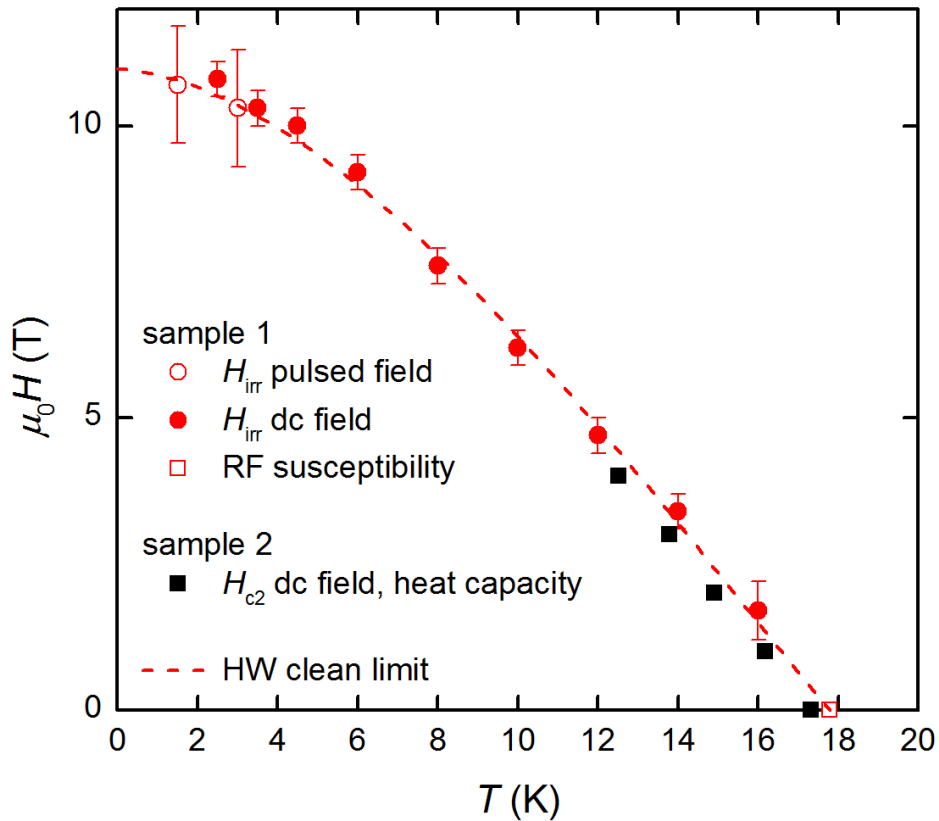

**Supplementary Figure 3** Irreversibility field  $H_{irr}$ , as determined by torque measurements, versus temperature for a sample with  $x = 0.51 \pm 0.02$  over the full temperature range. The solid circles are measurements in dc field and the open circles are in pulsed field (same sample). The  $T_c$  in zero field of this sample was determined by very low field radio-frequency susceptibility measurements. The solid squares are measurements of  $H_{c2}$  determined from the midpoint of the jump in the specific heat of a second sample with almost the same  $x$  ( $T_c$  of this sample is 0.4 K lower than the torque sample in zero field, and  $x$  is the same within error by EDX). The dashed line is a fit to the clean limit HW model [14] for  $H_{c2}(T)$ .

### Supplementary Figure 4

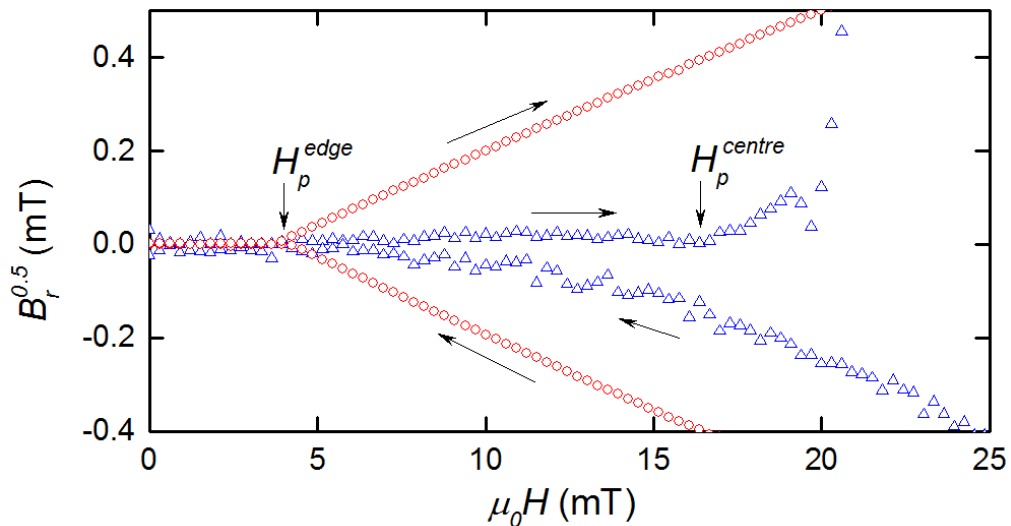

**Supplementary Figure 4** Remnant field  $B_r$  of a sample with  $x = 0.30$  that showed a wide superconducting transition of  $\Delta T_c > 1.5$  K. Two sensors at the edge (circles) and at the centre of the sample (triangles) are shown.

### Supplementary Figure 5

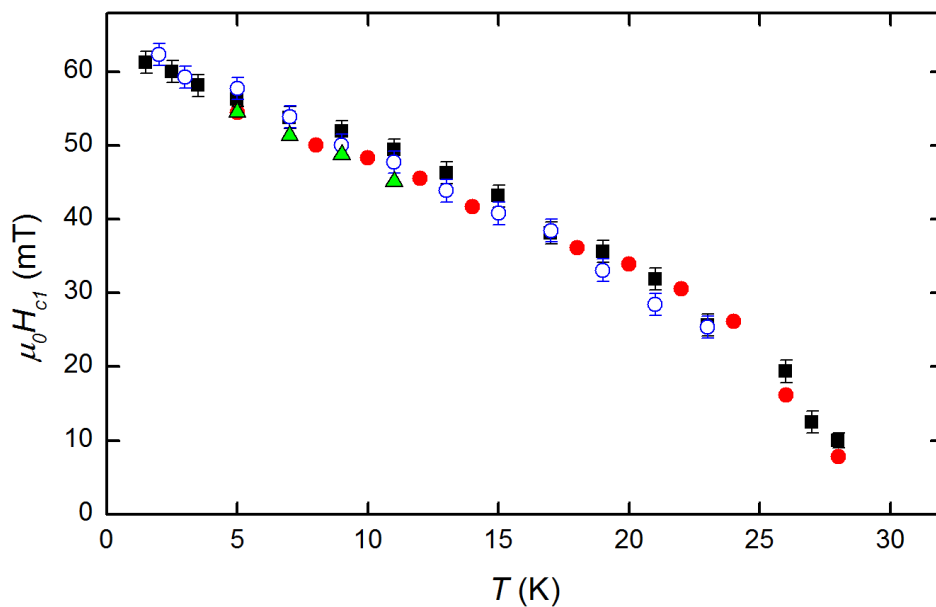

**Supplementary Figure 5**  $H_{c1}(T)$  for samples C24 and C2a with  $x = 0.3$  and  $x = 0.31$  respectively. Sample C24 has been cleaved repeatedly to produce samples with different  $l_c/l_a$  ratios: 0.05 (C24, open circles), 0.08 (C24, squares), 0.09 (C2a, filled circles) and 0.11 (C24, triangles), in order to test the accuracy of the demagnetising factor determination.

### Supplementary Figure 6

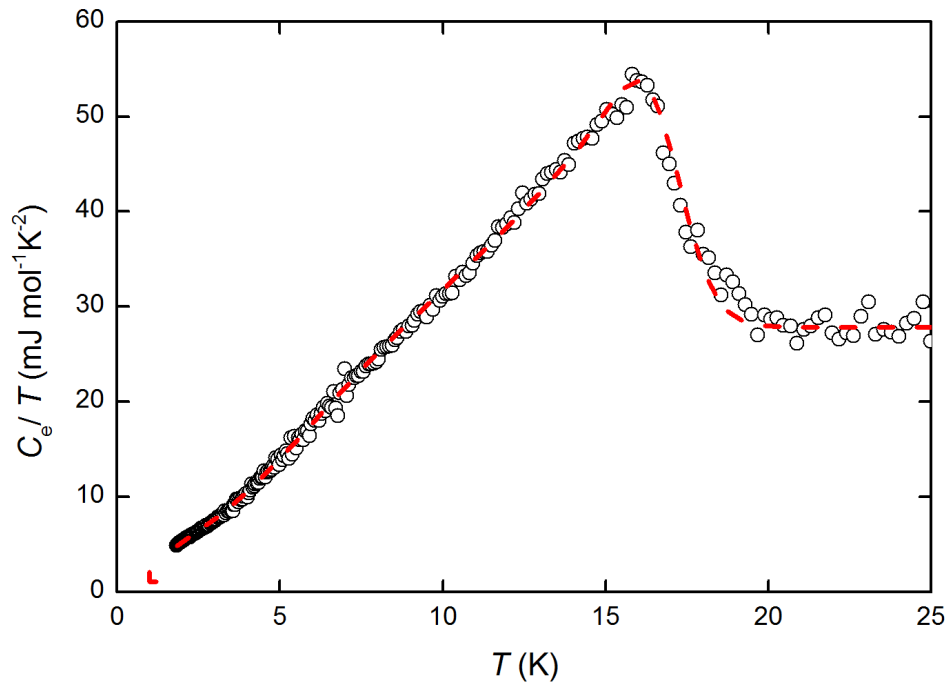

**Supplementary Figure 6** Heat capacity of a  $x = 0.47$  sample with the phonon contribution subtracted. The phonon contribution was determined directly by using a high field (14,T) to suppress the superconductivity. The dashed line is a fit to the data using a nodal gap alpha model similar to Ref. 36. The model has been convoluted with a Gaussian distribution to model the spread of  $T_c$  in the sample.

### Supplementary Table 1

| Sample | $x$  | $\Delta x$ | $l_c$ ( $\mu\text{m}$ ) | $l_a$ ( $\mu\text{m}$ ) |
|--------|------|------------|-------------------------|-------------------------|
| C19    | 0.29 | 0.01       | 11                      | 149                     |
| C24a   | 0.30 | 0.01       | 27                      | 360                     |
| C24b   | 0.30 | 0.01       | 18                      | 360                     |
| C24c   | 0.30 | 0.01       | 18                      | 170                     |
| C2a    | 0.31 | 0.01       | 28                      | 300                     |
| C21    | 0.34 | 0.01       | 20                      | 255                     |
| 0p3B   | 0.35 | 0.01       | 48                      | 115                     |
| C1     | 0.36 | 0.01       | 35                      | 269                     |
| C7a    | 0.39 | 0.02       | 17                      | 260                     |
| C9     | 0.47 | 0.02       | 40                      | 300                     |
| 0p6a   | 0.55 | 0.01       | 48                      | 240                     |

**Supplementary Table 1** List of dimension of the samples used for the  $H_{c1}$  measurements.
